# Supplementary material for: POLQ Overexpression Is Associated with an Increased Somatic Mutation Load and PLK4 Overexpression in Lung Adenocarcinoma
Source: PubMed Central journal article supplement (PMC6562496; doi:10.3390/cancers11050722), 2019-05-24
Supplement: cancers-11-00722-s001.pdf [file cancers-11-00722-s001.pdf]

# Supplementary Materials: POLQ Overexpression Is Associated with an Increased Somatic Mutation Load and PLK4 Overexpression in Lung Adenocarcinoma

Kazuya Shinmura, Hisami Kato, Yuichi Kawanishi, Katsuhiko Yoshimura, Kazuo Tsuchiya, Yoshiyuki Takahara, Seiji Hosokawa, Akikazu Kawase, Kazuhito Funai and Haruhiko Sugimura

- Supplementary Table S1: List of translesion DNA synthesis (TLS) polymerase genes analyzed in this study
- Supplementary Table S2: Tumor types from the TCGA database analyzed in this study
- Supplementary Figure S1: Another representative set of results of IHC analysis for concurrent overexpression of PLK4 and POLQ proteins in a case of LAC
- Supplementary Figure S2: Results of the box-plot analyses of cancer types showing increased expression of the TLS polymerase gene other than POLQ associated with an increased number of somatic mutations using data from the TCGA database; the data is linked with Figure 6a
- Supplementary Figure S3: Detection of concurrent overexpression of POLQ and PLK4 in diverse human cancers determined using data from the TCGA database; the data is linked with Figure 6c
- Supplementary Figure S4: Representative images of the staining intensities in the IHC analysis
- Supplementary Figure S5: Blots, molecular markers, and densitometric intensity ratios in Western blot analysis

**Table S1.** List of translesion DNA synthesis (TLS) polymerase genes analyzed in this study.

| <b>TLS gene name</b> | <b>Description</b>                                        | <b>OMIM ID</b> |
|----------------------|-----------------------------------------------------------|----------------|
| POLB                 | DNA Polymerase Beta                                       | 174760         |
| POLH                 | DNA Polymerase Eta                                        | 603968         |
| POLI                 | DNA Polymerase Iota                                       | 605252         |
| POLK                 | DNA Polymerase Kappa                                      | 605650         |
| POLL                 | DNA Polymerase Lambda                                     | 606343         |
| POLM                 | DNA Polymerase Mu                                         | 606344         |
| POLN                 | DNA Polymerase Nu                                         | 610887         |
| REV1                 | REV1, DNA Directed Polymerase                             | 606134         |
| REV3L                | REV3 Like, DNA Directed Polymerase Zeta Catalytic Subunit | 602776         |
| POLQ                 | DNA Polymerase Theta                                      | 604419         |

OMIM; Online Mendelian Inheritance in Man.

**Table S2.** Tumor types from the TCGA database analyzed in this study.

| <b>Tumor types</b>                                               | <b>TCGA ID</b> | <b>Number of tumor cases analyzed in Figures 2 and 6</b> |
|------------------------------------------------------------------|----------------|----------------------------------------------------------|
| Bladder urothelial carcinoma                                     | BLCA           | 408                                                      |
| Breast invasive carcinoma                                        | BRCA           | 1041                                                     |
| Cervical squamous cell carcinoma and endocervical adenocarcinoma | CESC           | 302                                                      |
| Cholangiocarcinoma                                               | CHOL           | 36                                                       |
| Colon adenocarcinoma                                             | COAD           | 284                                                      |
| Head and neck squamous cell carcinoma                            | HNSC           | 501                                                      |
| Chromophobe renal cell carcinoma                                 | KICH           | 66                                                       |
| Clear cell renal cell carcinoma                                  | KIRC           | 324                                                      |
| Papillary renal cell carcinoma                                   | KIRP           | 196                                                      |
| Liver hepatocellular carcinoma                                   | LIHC           | 198                                                      |
| Lung adenocarcinoma                                              | LUAD           | 513                                                      |
| Lung squamous cell carcinoma                                     | LUSC           | 492                                                      |
| Pancreatic adenocarcinoma                                        | PAAD           | 84                                                       |
| Prostate adenocarcinoma                                          | PRAD           | 495                                                      |
| Rectal adenocarcinoma                                            | READ           | 89                                                       |
| Stomach adenocarcinoma                                           | STAD           | 412                                                      |
| Thyroid carcinoma                                                | THCA           | 486                                                      |
| Uterine corpus endometrial carcinoma                             | UCEC           | 159                                                      |

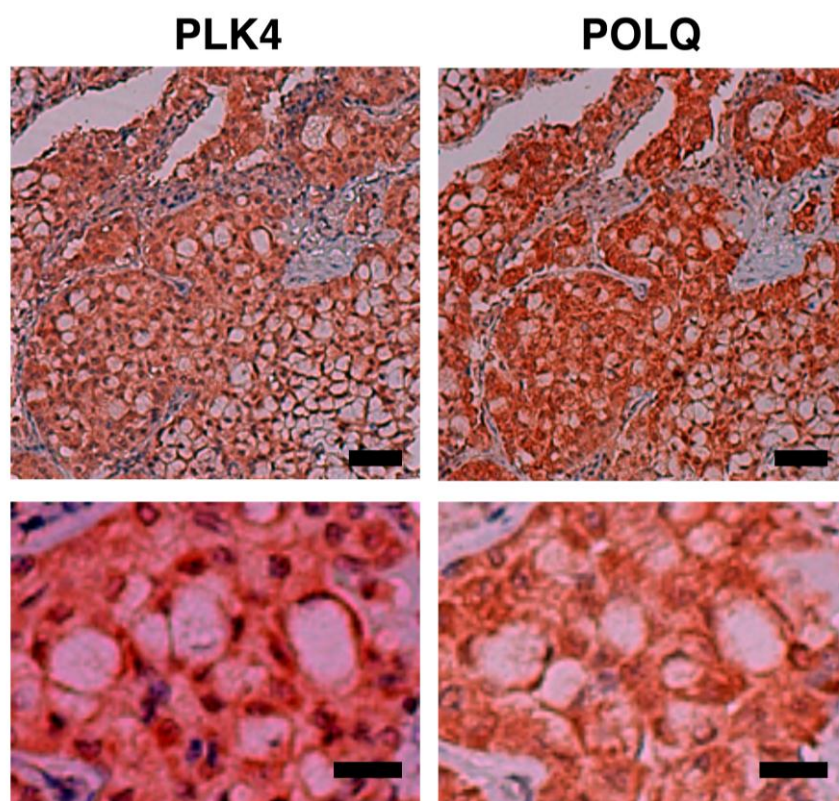

**Figure S1.** Another representative set of results of IHC analysis for concurrent overexpression of PLK4 and POLQ proteins in a case of LAC. Results of IHC analysis for PLK4 and POLQ proteins in the same LAC. The lower panels show a part of the upper panels at a higher magnification. Scale bar = 50  $\mu\text{m}$  (upper); 20  $\mu\text{m}$  (lower).

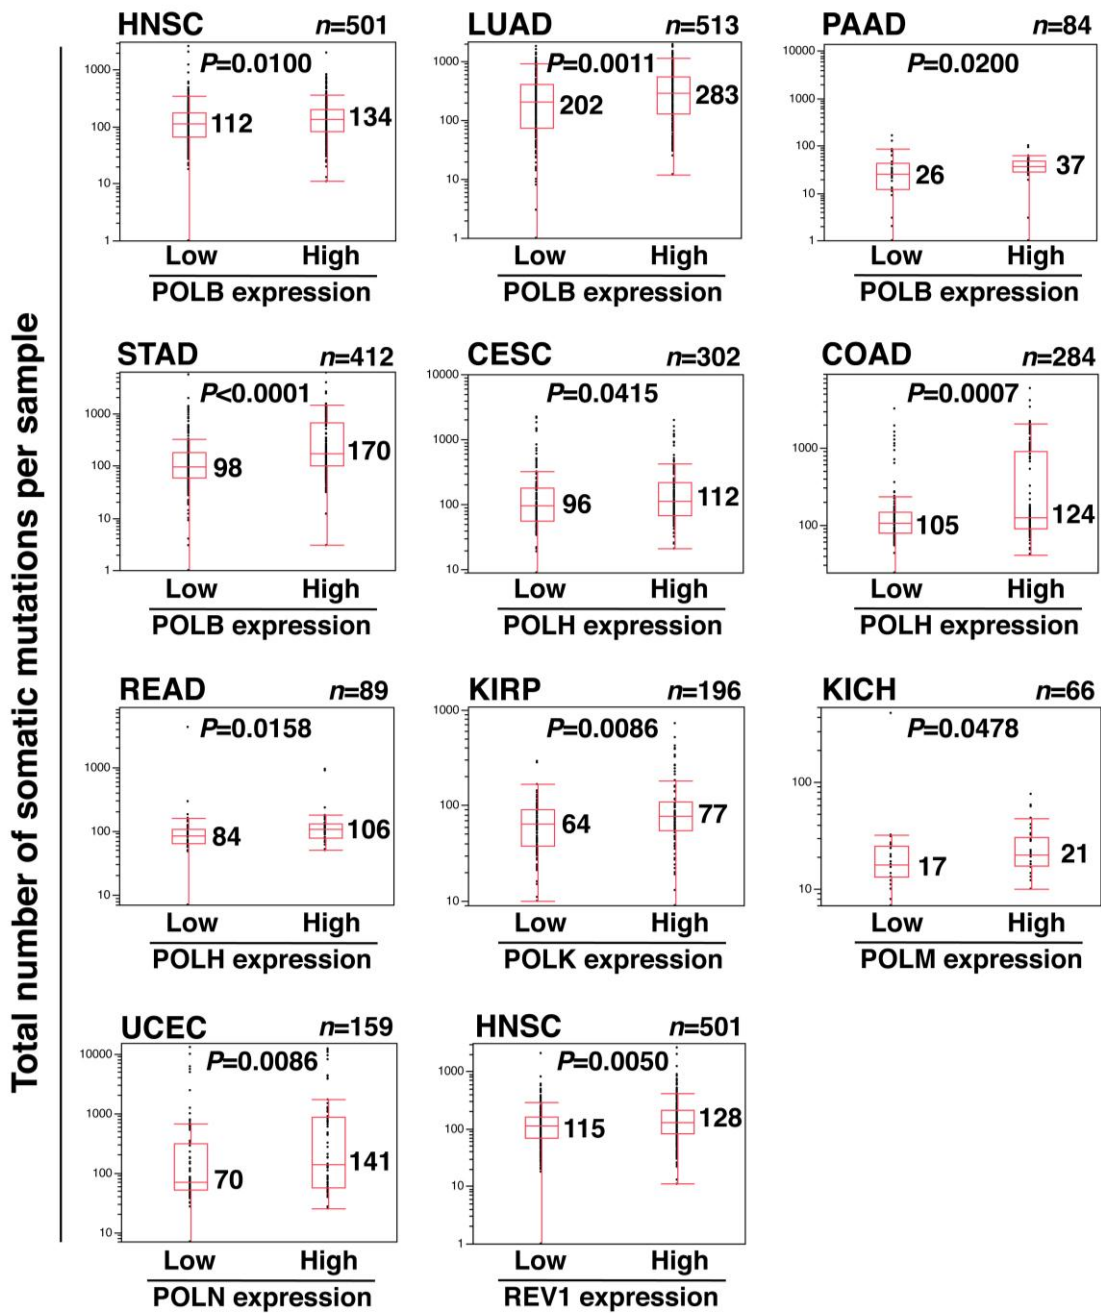

**Figure S2.** Results of the box-plot analyses of cancer types showing increased expression of the TLS polymerase gene other than POLQ associated with an increased number of somatic mutations using data from the TCGA database; the data is linked with Figure 6a. Median expression value in the cancer tissue samples was used as the cut-off value to dichotomize the cancer cases according to the expression levels of the TLS polymerase genes, and the total numbers of somatic mutations were compared between the cancers showing low TLS polymerase gene expression and those showing high TLS polymerase gene expression using the Mann–Whitney *U* test. The median mutation number in each group and the *p*-values are shown in the graph.

# Supplementary Figure S3

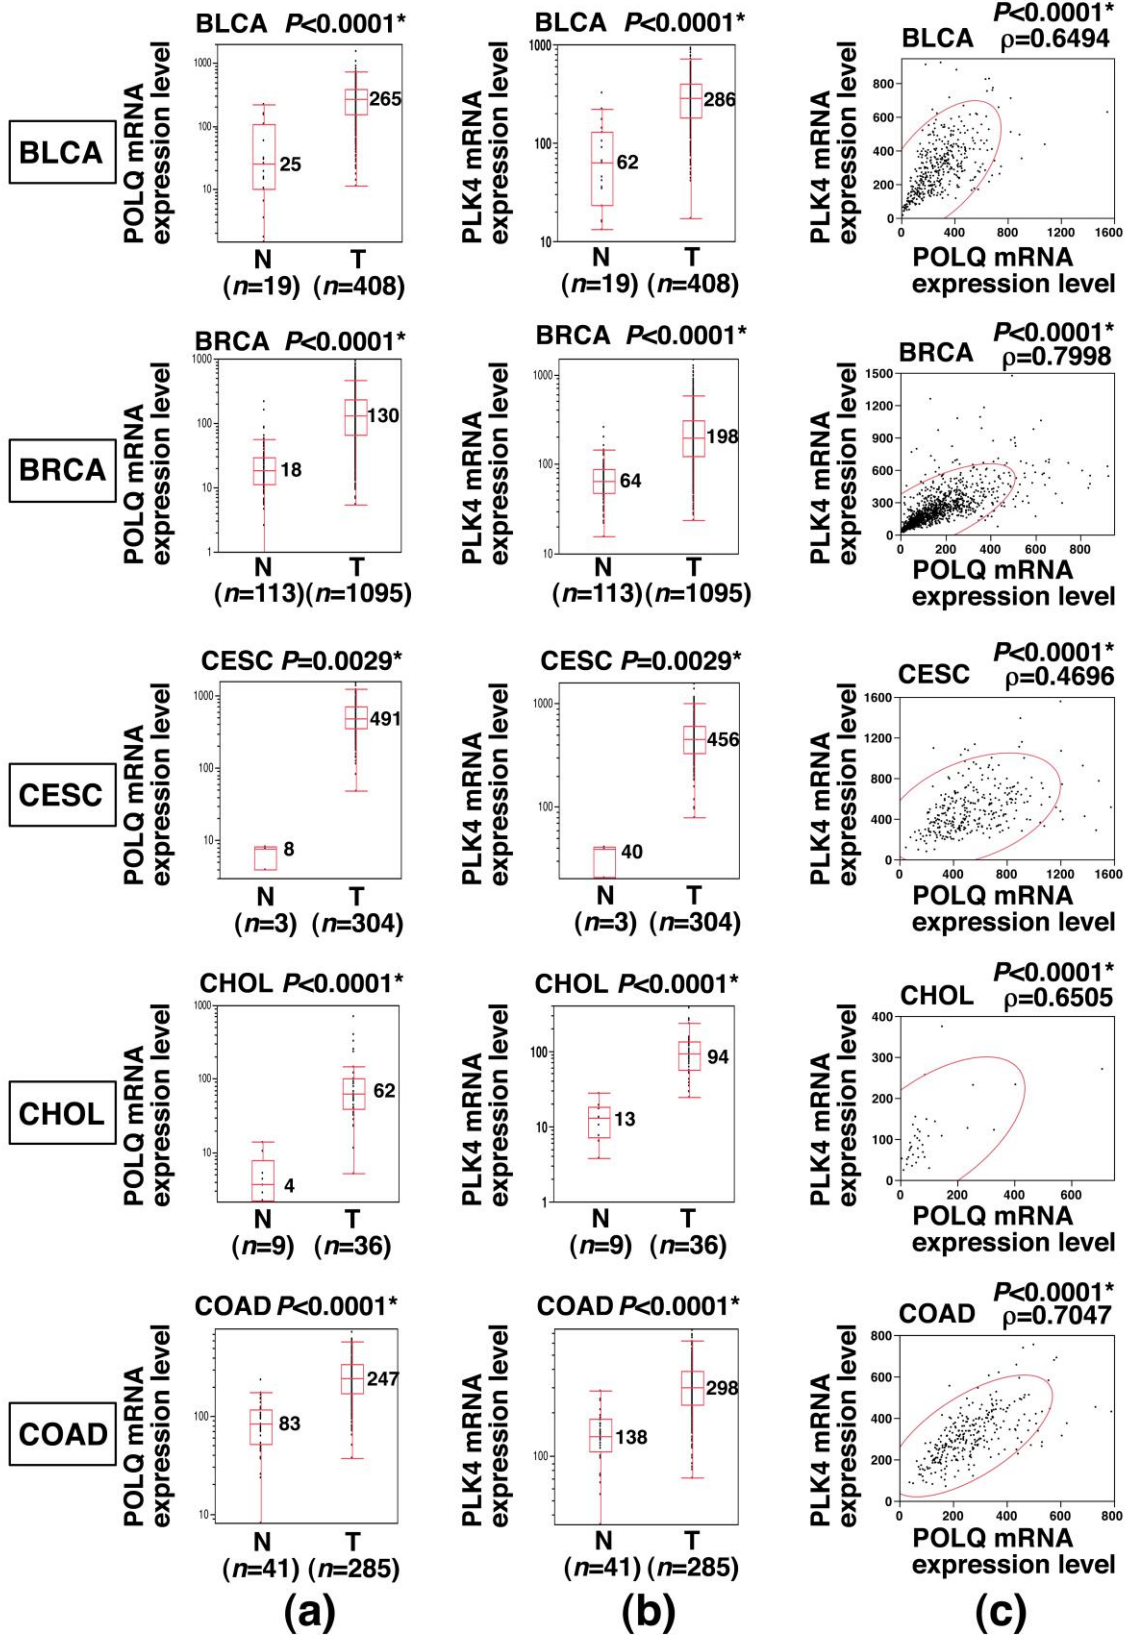



## Supplementary Figure S3 (continued)

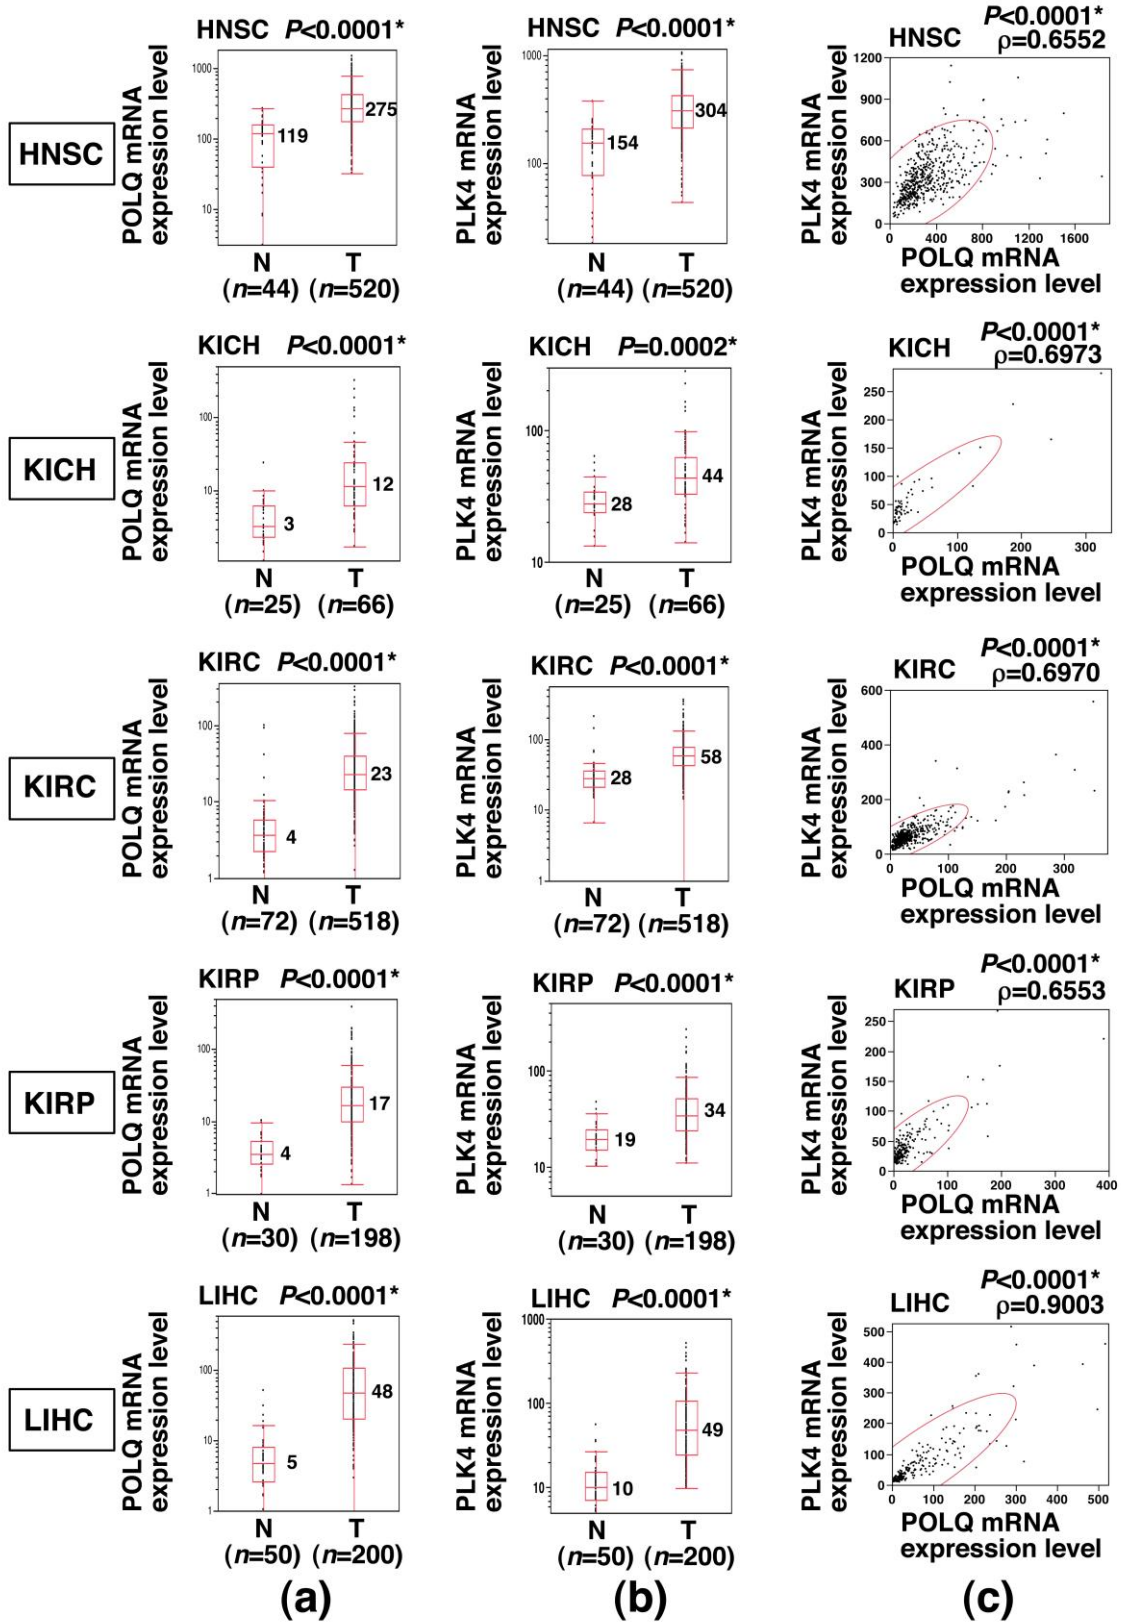

## Supplementary Figure S3 (continued)

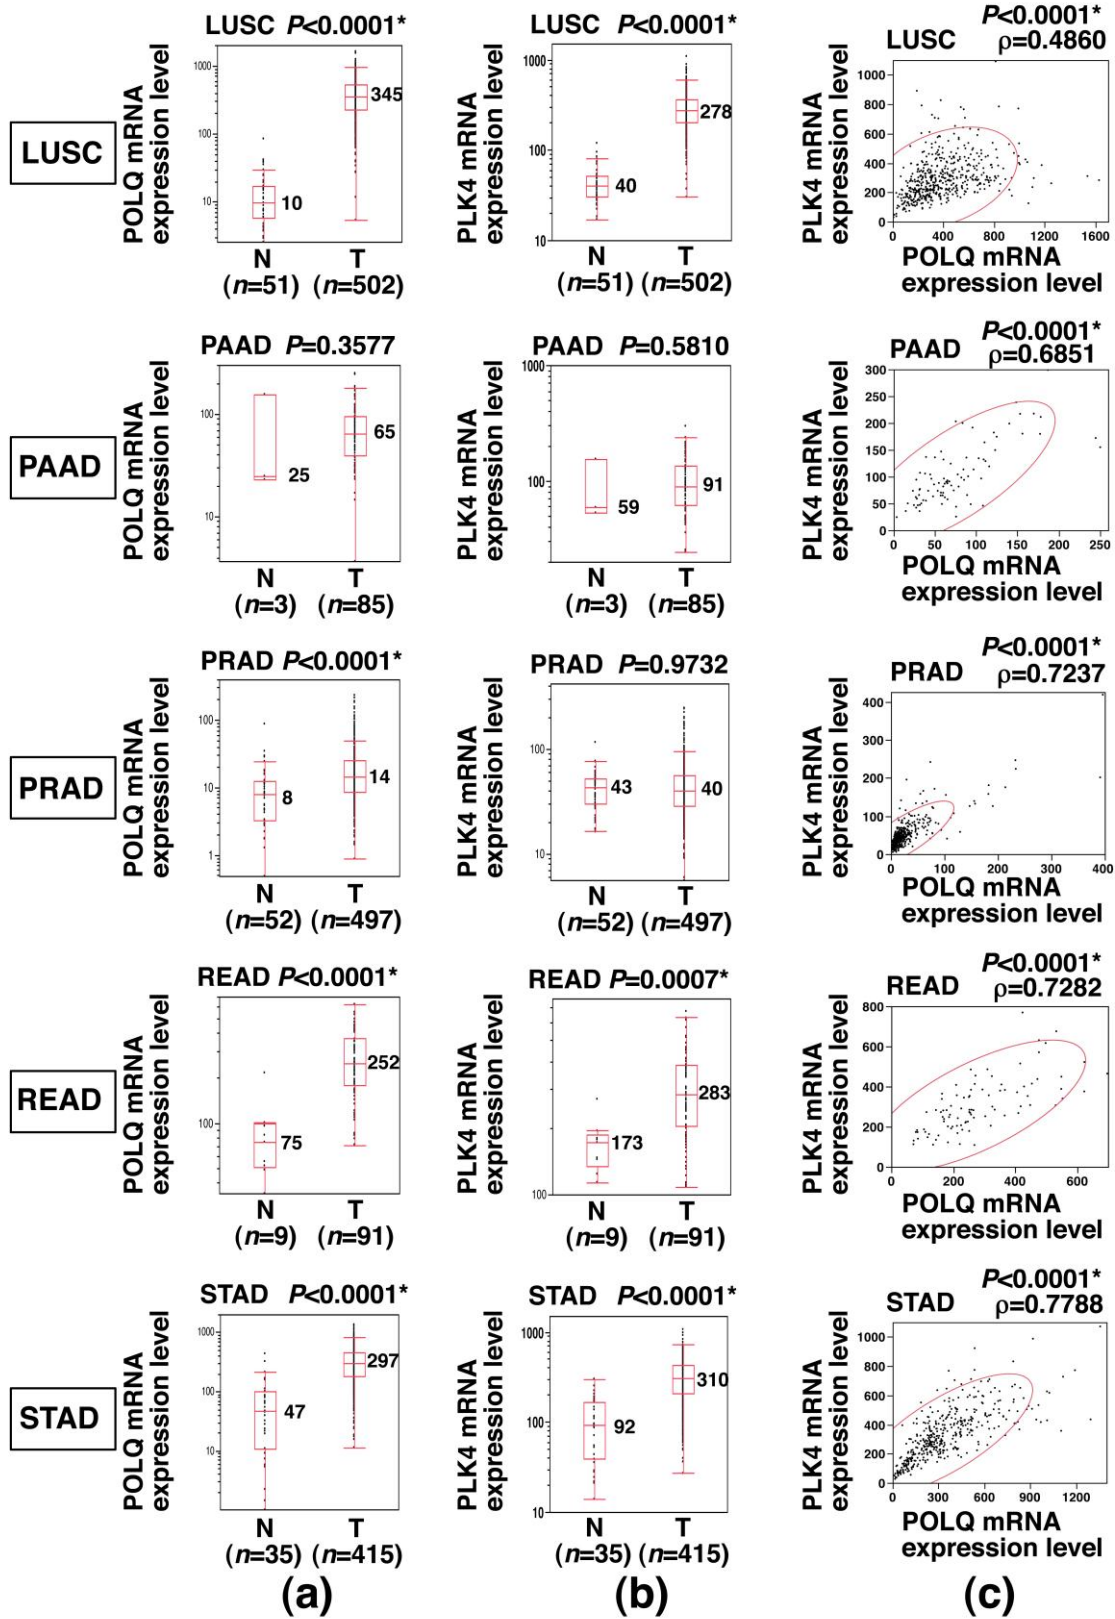

## Supplementary Figure S3 (continued)

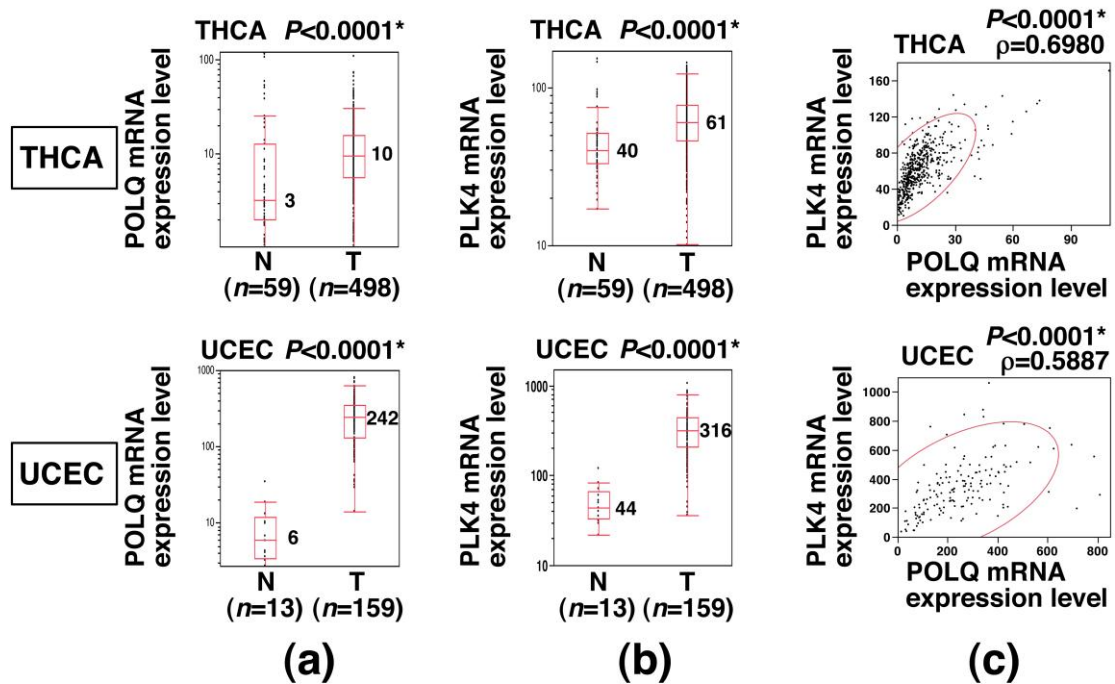

**Figure S3.** Detection of concurrent overexpression of POLQ and PLK4 in diverse human cancers determined using data from the TCGA database; the data is linked with Figure 6c. **(a)** Detection of POLQ mRNA overexpression in diverse human cancers. A Mann–Whitney  $U$  test was used for statistical comparison of the findings between non-cancerous tissue (N) and cancerous tissue (T) derived from 17 cancer types; the  $p$ -values and median expression levels are shown. **(b)** Detection of PLK4 mRNA overexpression in diverse human cancers. A Mann–Whitney  $U$  test was used for statistical comparison of the findings between non-cancerous tissue (N) and cancerous tissue (T) derived from 17 cancer types; the  $p$ -values and median expression levels are shown. **(c)** A significant positive correlation was detected between the POLQ and PLK4 mRNA expression levels in diverse human cancers. The Spearman rank correlation coefficient ( $\rho$ ) and  $p$ -values are shown. A bivariate normal ellipse ( $p = 0.95$ ) was obtained. The asterisks show a statistically significance in (a)–(c).



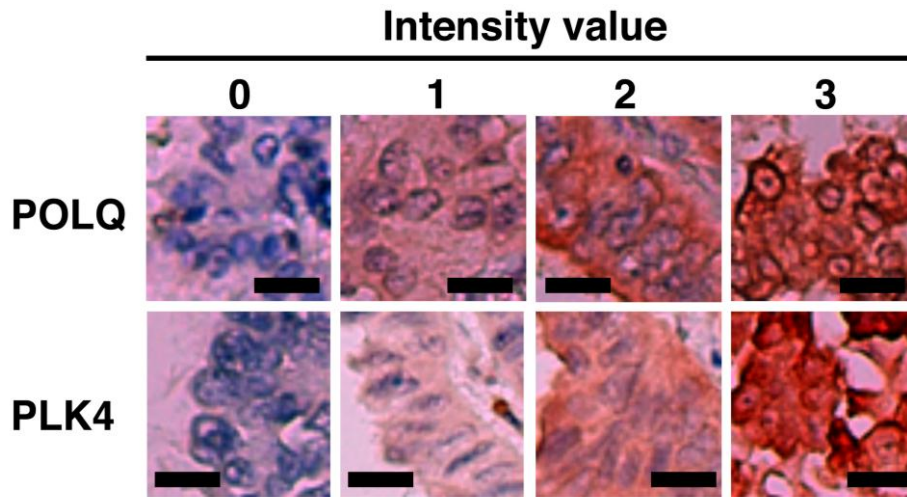

**Figure S4.** Representative images of the staining intensities in the IHC analysis. Representative images of intensity value (0, absent; 1, weak; 2, moderate; 3, strong) to assess the protein expression level of POLQ and PLK4 are shown. Scale bar = 20  $\mu$ m.

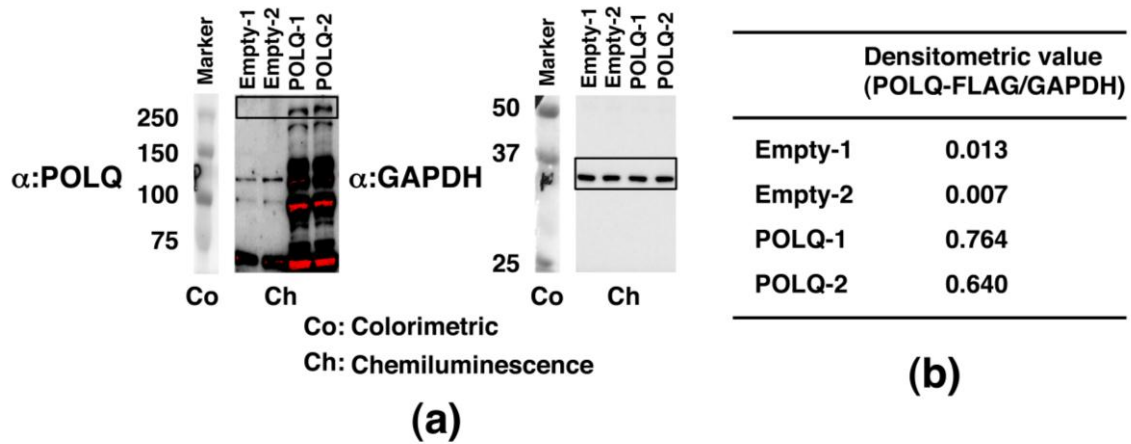

**Figure S5.** Blots, molecular markers, and densitometric intensity ratios in Western blot analysis. (a) The results of chemiluminescence and colorimetric detection for Figure 3a are shown. The rectangle is a photograph of Figure 3a. (b) Densitometric intensity ratios (POLQ-FLAG/GAPDH) measured using the ImageJ software (National Institute of Health, Bethesda, MD, USA) are shown.
